# Supplementary material for: Deoxyalkylation of guaiacol using haggite structured V4O6(OH)4
Source: Royal Society of Chemistry journal article supplement (doi:10.1039/c9cy00024k), 2019-01-01
Supplement: c9cy00024k1.pdf [file c9cy00024k1.pdf]

## Deoxyalkylation of Guaiacol with Catalysis of Haggite Structured $V_4O_6(OH)_4$

Fei Yan,<sup>b</sup> Zhe Wen,<sup>b</sup> Kai Wu,<sup>b</sup> Kai Cui,<sup>b</sup> Fuhang Mai,<sup>b</sup> Zewei Ma,<sup>b</sup> Yushuai Sang,<sup>b</sup> Yunfei Bai,<sup>b</sup>  
Hong Chen<sup>\*a</sup> and Yongdan Li<sup>\*bc</sup>

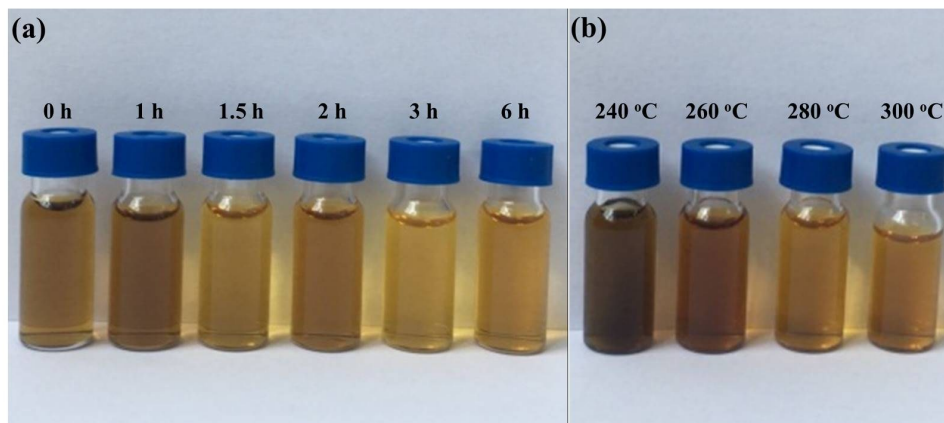

**Figure S1.** (a) The liquid products acquired from guaiacol conversion in methanol at 280 °C for different time. (b) The liquid products acquired from guaiacol conversion in methanol at different temperatures for 6 h. Reaction conditions: 0.5 g  $V_2O_5$ , 1.0 g guaiacol, 60 mL methanol.

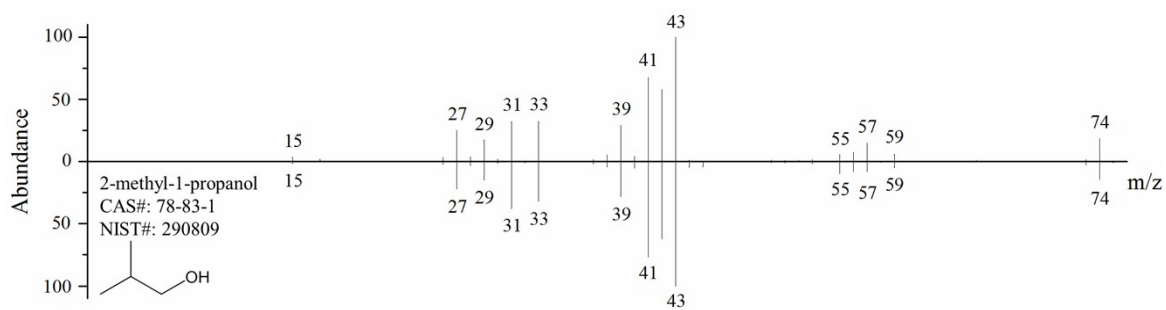

**Figure S2.** The mass spectrum of 2-methyl-1-propanol detected in post-reaction liquid mixture (upper) and the standard mass spectrum of 2-methyl-1-propanol, NIST#: 290809 (lower).

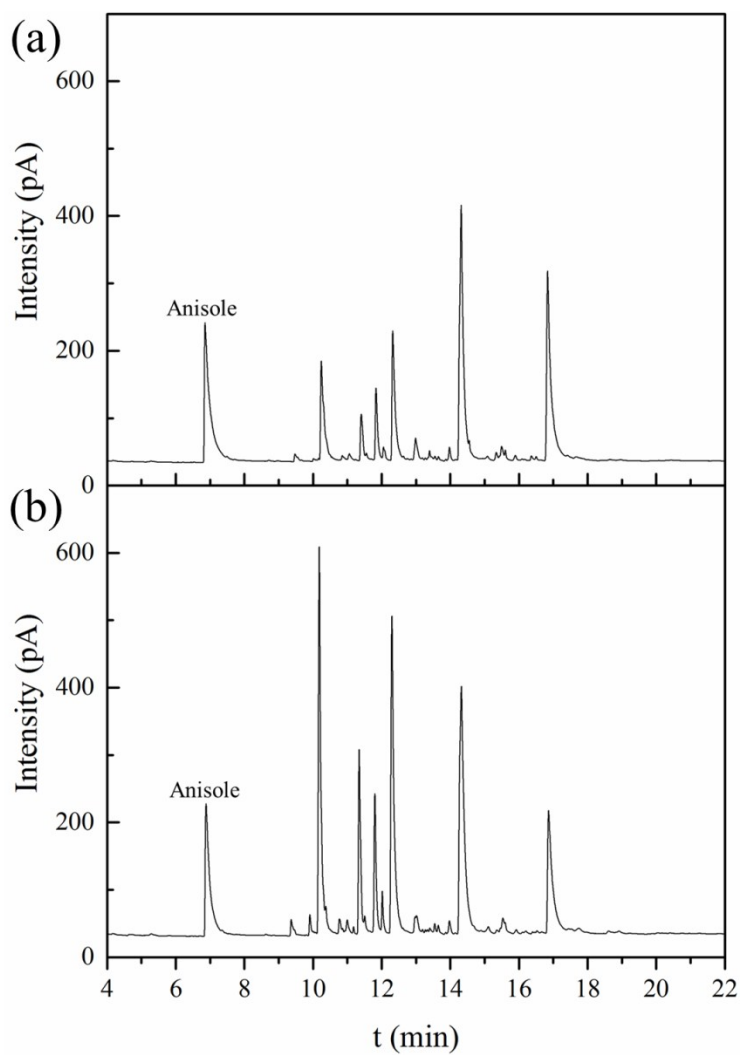

**Figure S3.** GC spectra of liquid mixtures acquired with catechol (a) or guaiacol (b) as substrate. Reaction conditions: 0.5 g  $V_2O_5$ , 1.0 g substrate, 60 mL methanol, 300 °C, 6 h. Note: Anisole is the internal standard.
